# Supplementary material for: Forever Young? Late Shoot Pruning Affects Phenological Development, Physiology, Yield and Wine Quality of Vitis vinifera cv. Malbec
Source: MDPI journal article supplement (doi:10.3390/agriculture12050605), 2022-04-25
Supplement: s1 [file s1]

## Supplementary Materials:

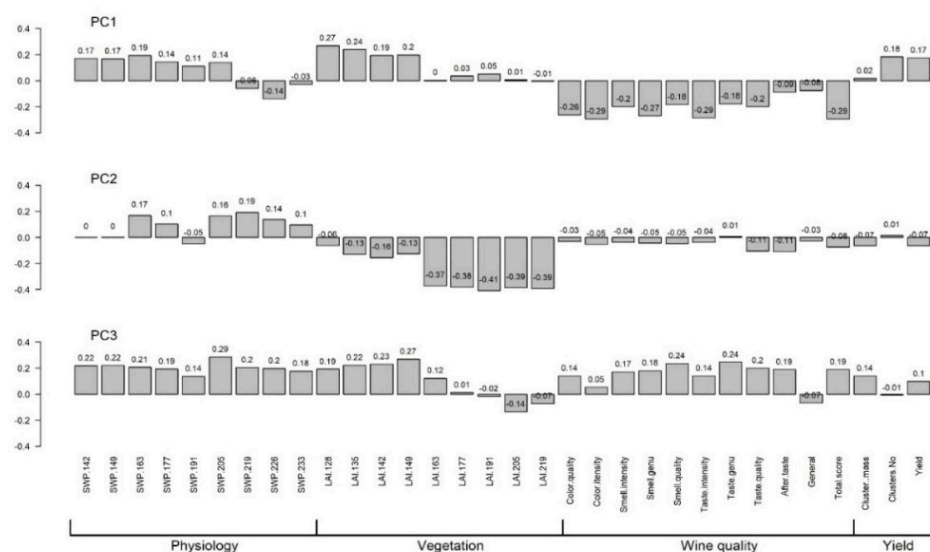

**Figure S1.** The barplots show the extent of variability explained by each attribute in the first three components (PCs 1-3).

**Table S1.** Percent of dehydrated leaves at 2017 (n=4). The evaluation was performed a week before harvest. The different letters indicate statistically significant differences ( $\alpha=0.05$ ) among the treatments for each variable, based on one-way ANOVA followed by post-hoc TukeyHSD test.

| Treatment |                   |
|-----------|-------------------|
| LSP1      | 5.5 <sup>b</sup>  |
| LSP2      | 5.5 <sup>b</sup>  |
| LSP3      | 5.9 <sup>b</sup>  |
| WP+T      | 6.1 <sup>b</sup>  |
| WP        | 42.3 <sup>a</sup> |
